# Supplementary material for: Glycosylated naphthalimides and naphthalimide Tröger's bases as fluorescent aggregation probes for Con A
Source: Royal Society of Chemistry journal article supplement (doi:10.1039/c8ob02980f), 2019-01-01
Supplement: c8ob02980f1.pdf [file c8ob02980f1.pdf]

*Supporting Information*

**Glycosylated Naphthalimides and Naphthalimide Träger's  
Bases as Fluorescent Aggregation Probes for Con A**

Elena Calatrava-Pérez,<sup>a</sup> Jason M. Delente,<sup>a</sup> Sankarasekaran Shanmugaraju,<sup>a</sup> Chris S. Hawes,<sup>b</sup> Clive D. Williams,<sup>c</sup> Thorfinnur Gunnlaugsson<sup>\*a</sup> and Eoin M. Scanlan<sup>\*a</sup>

<sup>a</sup>*School of Chemistry and Trinity Biomedical Sciences Institute (TBSI), Trinity College Dublin, The University of Dublin, Dublin 2, Ireland.*

<sup>b</sup>*School of Chemical and Physical Sciences, Keele University, Keele ST5 5BG, UK.*

<sup>c</sup>*School of Biochemistry and Immunology and Trinity Biomedical Sciences Institute (TBSI), Trinity College Dublin, The University of Dublin, Dublin 2, Ireland.*

[gunnlaut@tcd.ie](mailto:gunnlaut@tcd.ie), [eoin.scanlan@tcd.ie](mailto:eoin.scanlan@tcd.ie)

## ***Table of Contents***

|                                                             |            |
|-------------------------------------------------------------|------------|
| <b>Photophysical characterisation of compounds 1-3.....</b> | <b>S3</b>  |
| <b><i>In vitro</i> studies of compounds 1-3.....</b>        | <b>S7</b>  |
| <b>Morphology studies of compounds 1 and 3.....</b>         | <b>S9</b>  |
| <b>NMR data for compound 3.....</b>                         | <b>S11</b> |
| <b>References.....</b>                                      | <b>S12</b> |

## Photophysical Characterisation

Compound **1** possesses a broad characteristic ICT band due to the 4-NH<sub>2</sub> substitution with its maximum found at 430 nm (Figure 5.2a). The fluorescence spectra recorded in PBS at 25 °C present a band centred at *ca.* 530 nm ( $\lambda_{\text{exc}} = 433$  nm). In contrast, **3** presents an absorption band at 380 nm, which possesses a shoulder *ca.* 350 nm. The emission spectra showed a band centred at 510 nm ( $\lambda_{\text{exc}} = 380$  nm). Therefore, both the absorption and emission spectra of compound **3** are blue shifted around 50 nm with respect to **1**.

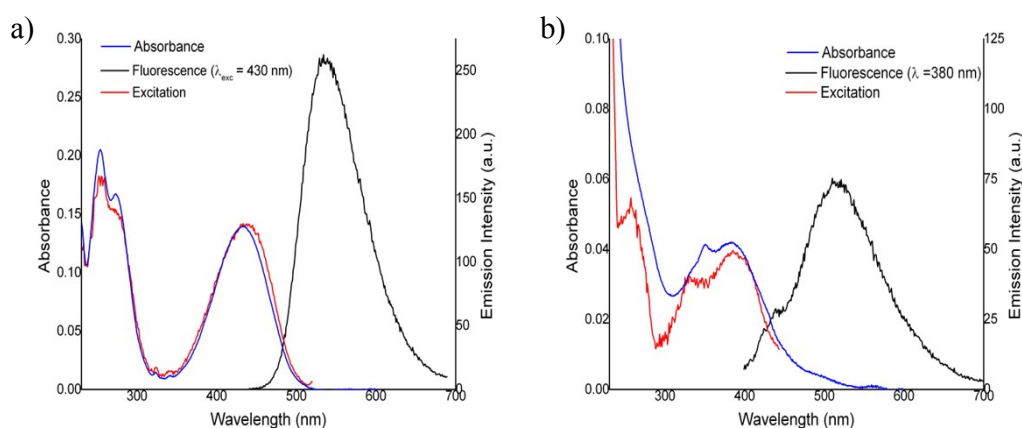

**Fig S1.** Absorption (blue), fluorescence (black) and excitation (red) spectra of **1** (a) and **3** (b), respectively, measured in PBS at 25 °C.

Table S.1 summarises the characteristic bands of **1** and **3**, extinction coefficient ( $\epsilon$ ) and fluorescent quantum yield ( $\Phi_F$ ) calculated in PBS. Fluorescent quantum yields were calculated using Fluorescein as standard reference.<sup>1</sup>  $\Phi_F$  values were calculated by comparing the integrated areas underneath the emission band of the spectra using equation 1.

$$(\Phi_F)_x = (\Phi_F)_r \cdot A_r/A_x \cdot F_x/F_r \cdot (\eta_x)^2/(\eta_r)^2 \quad (\text{eq. 1})$$

**Table S.1.**

| Compound | $\lambda_{\max}$ (nm) |                                                            | $\phi_F$<br>( $\pm$ SEM %) |
|----------|-----------------------|------------------------------------------------------------|----------------------------|
|          | $\pi$ - $\pi^*$       | ICT ( $\epsilon$ ( $M^{-1} \text{ cm}^{-1}$ ) $\pm 10\%$ ) |                            |
| <b>1</b> | 254, 273              | 433 (12,000)                                               | $11.5 \pm 0.09$            |
| <b>3</b> | -                     | 380 (8,900)                                                | $2.5 \pm 0.09$             |

Concentration studies of **1** and **3** were carried out in DPBS (Dulbecco's phosphate-buffered saline) solution. As can be seen in Figure S2, in both cases aggregation in DPBS occurred at concentrations higher than  $5 \times 10^{-5}$  M. However, the fluorescence quenching was more pronounced in the case of **1** (Fig S2b).

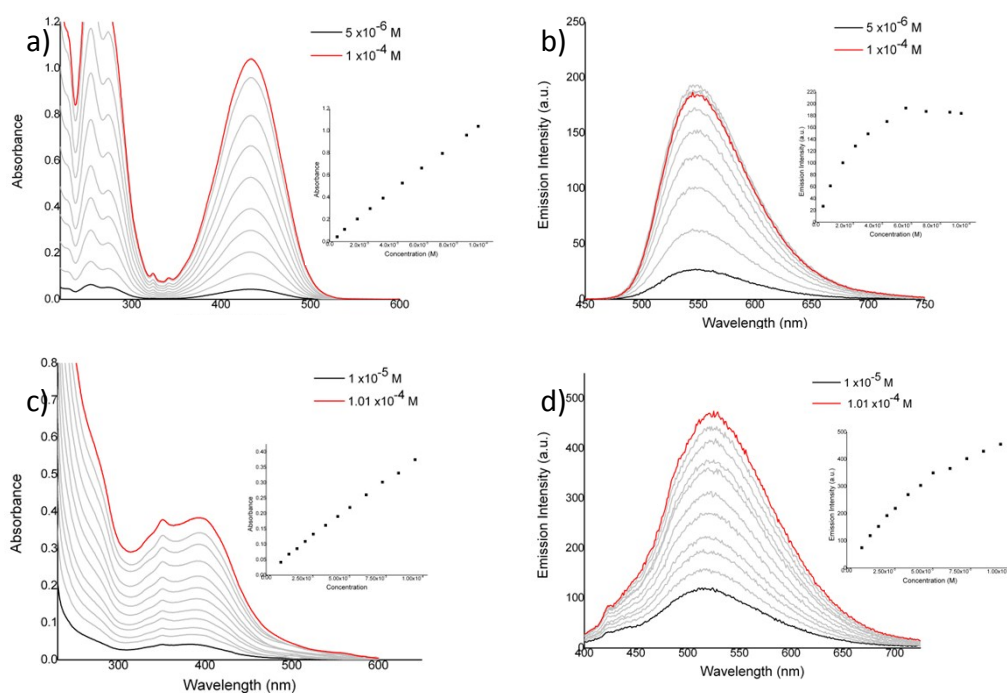

**Fig S2** Absorption (a and c) and emission (b and d) spectra, respectively, of **1** (a and b) and **3** (c and d), at different concentrations. The spectra were recorded in PBS at 25 °C. Inserts in b) and d) show the quenching in fluorescent emission at concentrations higher than  $5 \times 10^{-5}$  M.

Compound **2** presents similar absorption, emission and excitation bands to compound **3** (Figure S3). An absorption band is observed at 385 nm, which also presents a shoulder at 350 nm. The emission spectrum (black line) presents a band centred at 525 nm ( $\lambda_{\text{exc}} = 385$  nm). However, the excitation spectra (red line) is red-

shifter *ca.* 30 nm compared to the absorption spectra, which was not observed for compound **3**.

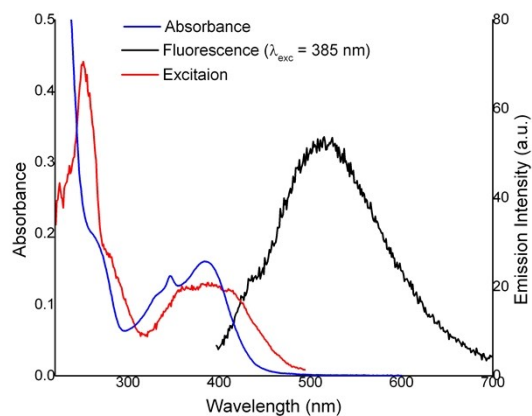

**Fig S3.** Absorption (blue), fluorescence (black) and excitation (red) spectra of **2** measured in PBS at 25 °C.

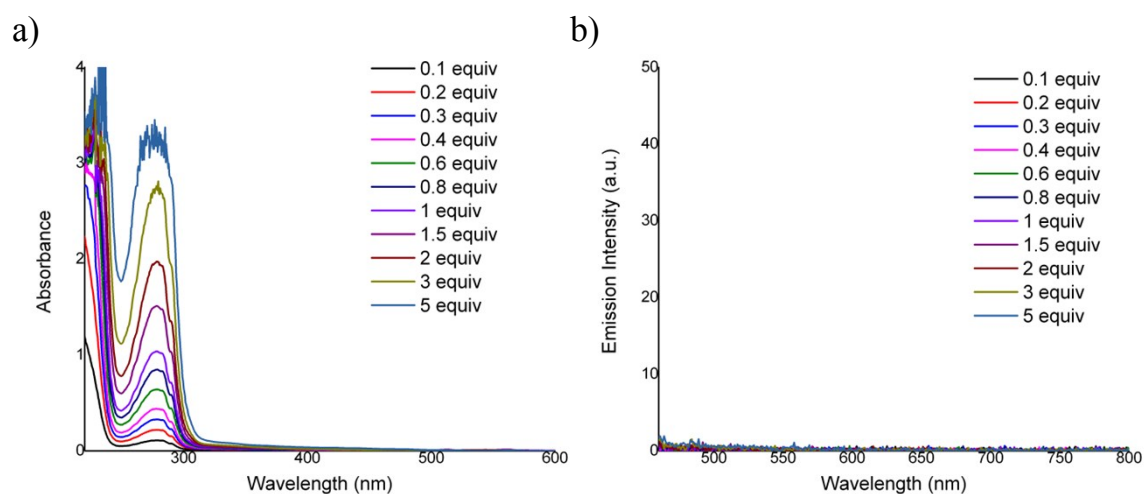

**Fig S4** Changes in the absorption (a) and fluorescence emission spectra ( $\lambda_{\text{exc}} = 433 \text{ nm}$ ) of Con A at different concentrations, recorded in DPBS pH 7.2 (0.1 mM  $\text{CaCl}_2$  and 0.1 mM  $\text{MnCl}_2$ ) at 25 °C

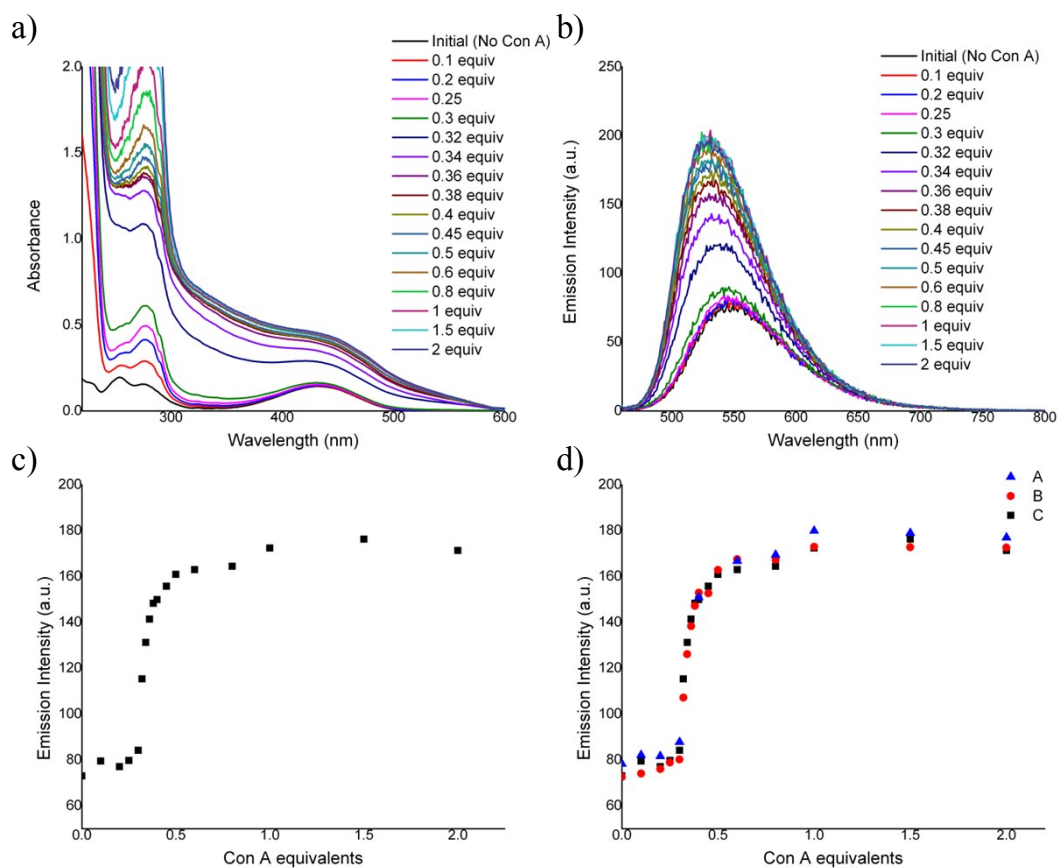

**Fig S5.** Changes in the absorption (a) and fluorescence emission spectra (b) of **Man-Nap** ( $1 \times 10^{-5}$  M) upon the addition of Con A recorded in DPBS pH 7.2 (0.1 mM CaCl<sub>2</sub> and 0.1 mM MnCl<sub>2</sub>) at 25 °C. c) changes in the fluorescence emission intensity ( $\lambda_{\text{max}} = 545$  nm) of **Man-Nap** vs. Con A equivalents. Figures representative of three independent experiments. d) Changes in the fluorescence emission intensity ( $\lambda_{\text{max}} = 545$  nm) of **Man-Nap** vs. Con A equivalents from three independent experiments.

Galactose terminated glyconaphthalimide probes were incubated with 0.1 equivalents of Con A as negative controls (Fig S4). This experiment demonstrated that only the  $\alpha$ -mannose functionalised probes interact with Con A, provoking a change in the fluorescence emission. The synthesis of these compounds have been previously described in the literature.<sup>2</sup>

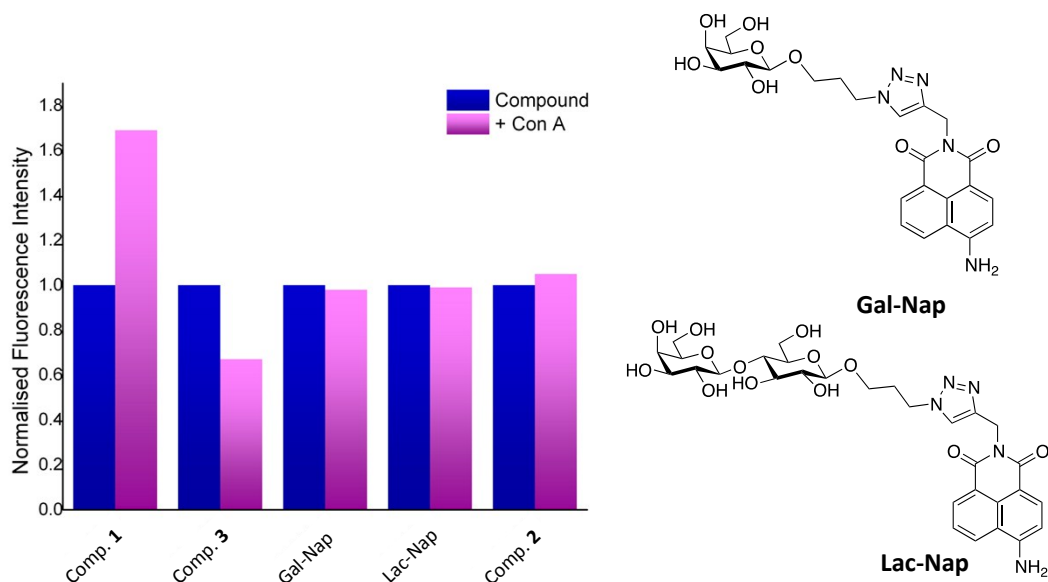

**Fig S6** Normalised fluorescence intensity of a range of glyconaphthalimide probes and compound **2**, before (blue) and after (magenta) the addition of 0.1 equivalents of Con A. The experiments were carried out in DPBS in the presence of 0.1 mM MnCl<sub>2</sub> and 0.1 mM CaCl<sub>2</sub> at 25 °C.

### *In vitro* studies of compounds 1-3

Table S2 shows the toxicity of compounds **2** and **3** in HeLa cells after 24 h and 72 h incubation. The toxicity of compound **1** has previously been reported.<sup>2</sup>

**Table S2.**

| Compound | IC <sub>50</sub> (μM) |      |
|----------|-----------------------|------|
|          | 24 h                  | 72 h |
| <b>3</b> | >100                  | >100 |
| <b>2</b> | >100                  | >100 |

Uptake studies of compound **2** (50  $\mu$ M) in HeLa cells at different incubation times showed a greater uptake of the aggregates after long incubation times (Fig S7).

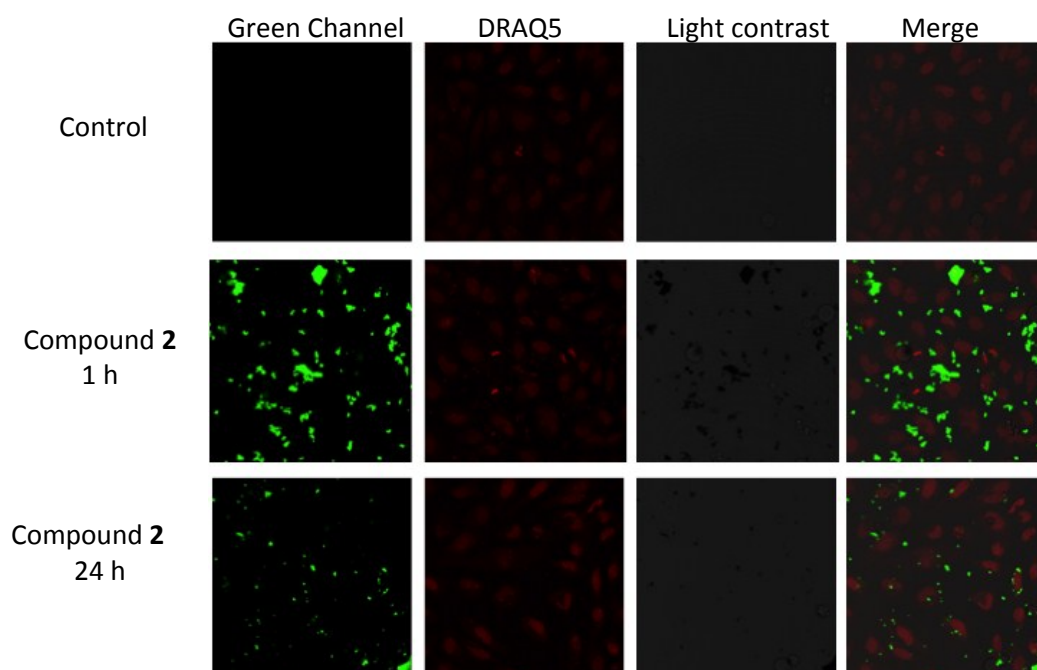

**Fig S7** Confocal images of HeLa cells treated with compound **2** at different times. Compounds were excited by a 405 nm argon laser, emission 450-550 nm, DRAQ5 was excited by a 633 nm red helium-neon laser, emission >650 nm.

### Morphology studies of compounds **1** and **3**



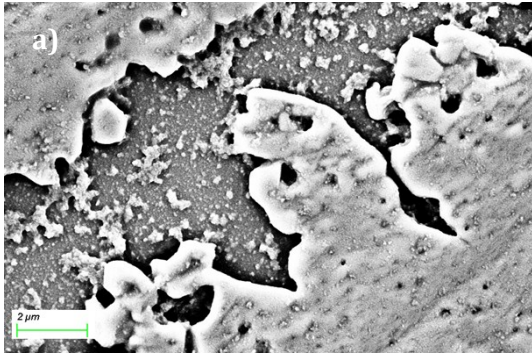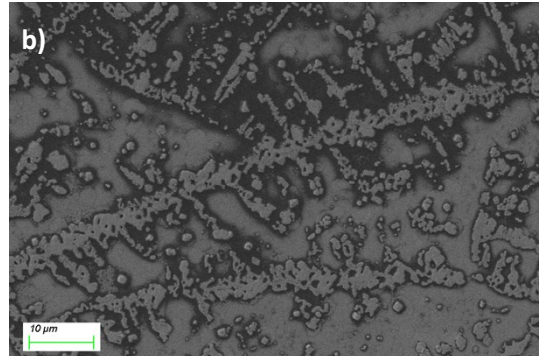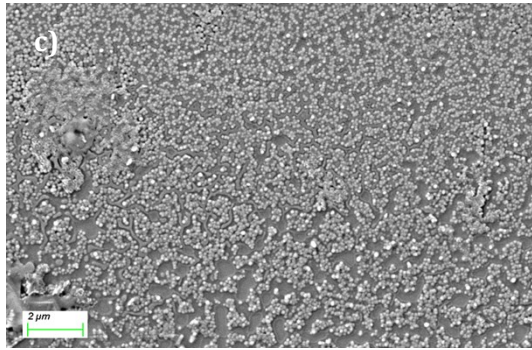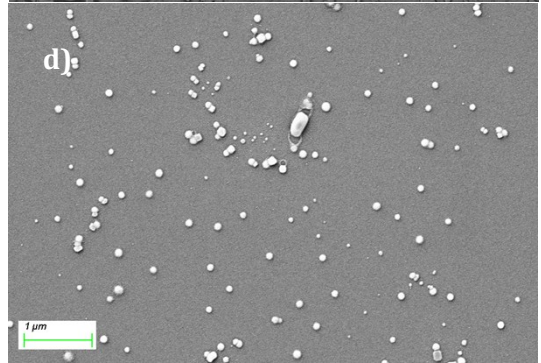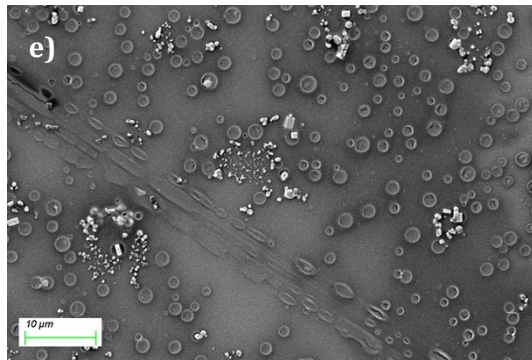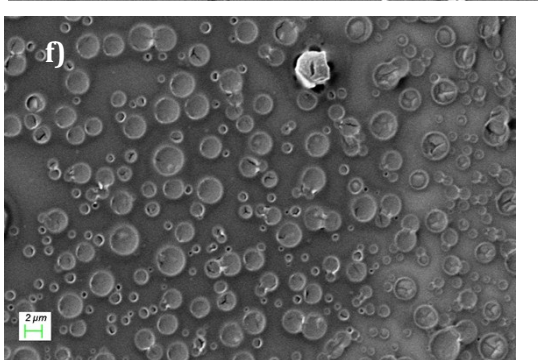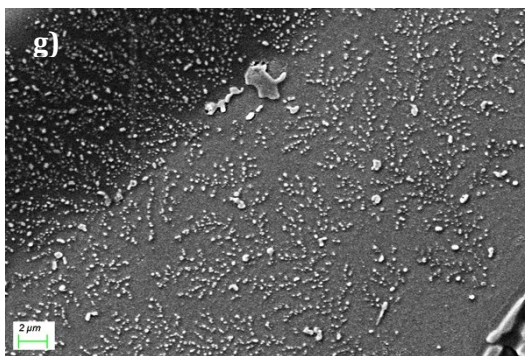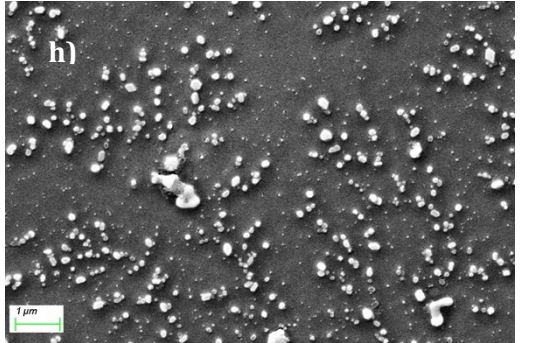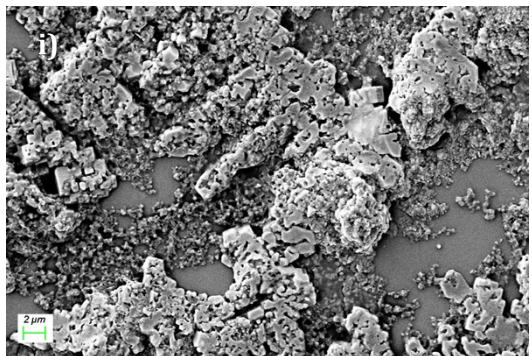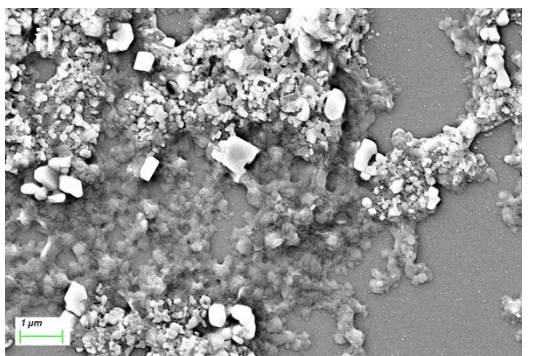

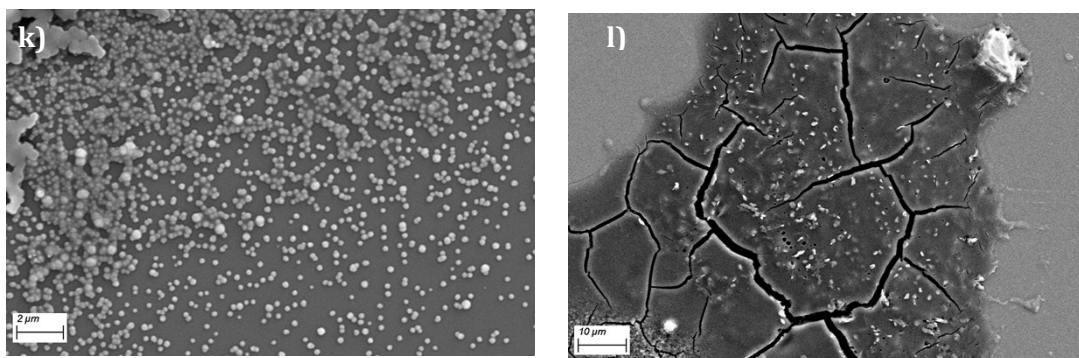

**Fig S8** DPBS (a) and Con A alone ( $1 \times 10^{-5}$  M, b) were imaged under same conditions as controls. Further SEM images of **3** ( $1 \times 10^{-4}$  M in DPBS) before (c, d) and after addition of Con A (0.1 equiv) (e, f) and **1** ( $1 \times 10^{-4}$  M in DPBS) before (g, h) and after addition of Con A (0.1 equiv) (i, j), and of **3** ( $1 \times 10^{-4}$  M in water) (k) and **1** ( $1 \times 10^{-4}$  M in water) (l).

| Sample                                          | Size (d, nm) | Standard deviation (d, nm) | PDI   |
|-------------------------------------------------|--------------|----------------------------|-------|
| <b>3</b> ( $1 \times 10^{-4}$ M in DPBS)        | 423.9        | 31.11                      | 0.469 |
| <b>3 + ConA</b> ( $1 \times 10^{-4}$ M in DPBS) | 5390         | 316.2                      | 0.182 |

**Fig S9** DLS results of the measurement on **3** and **3 + con A** ( $1 \times 10^{-4}$  M in DPBS) demonstrating the formation of aggregates in solution

### NMR data for compound 3.

#### Compound 3

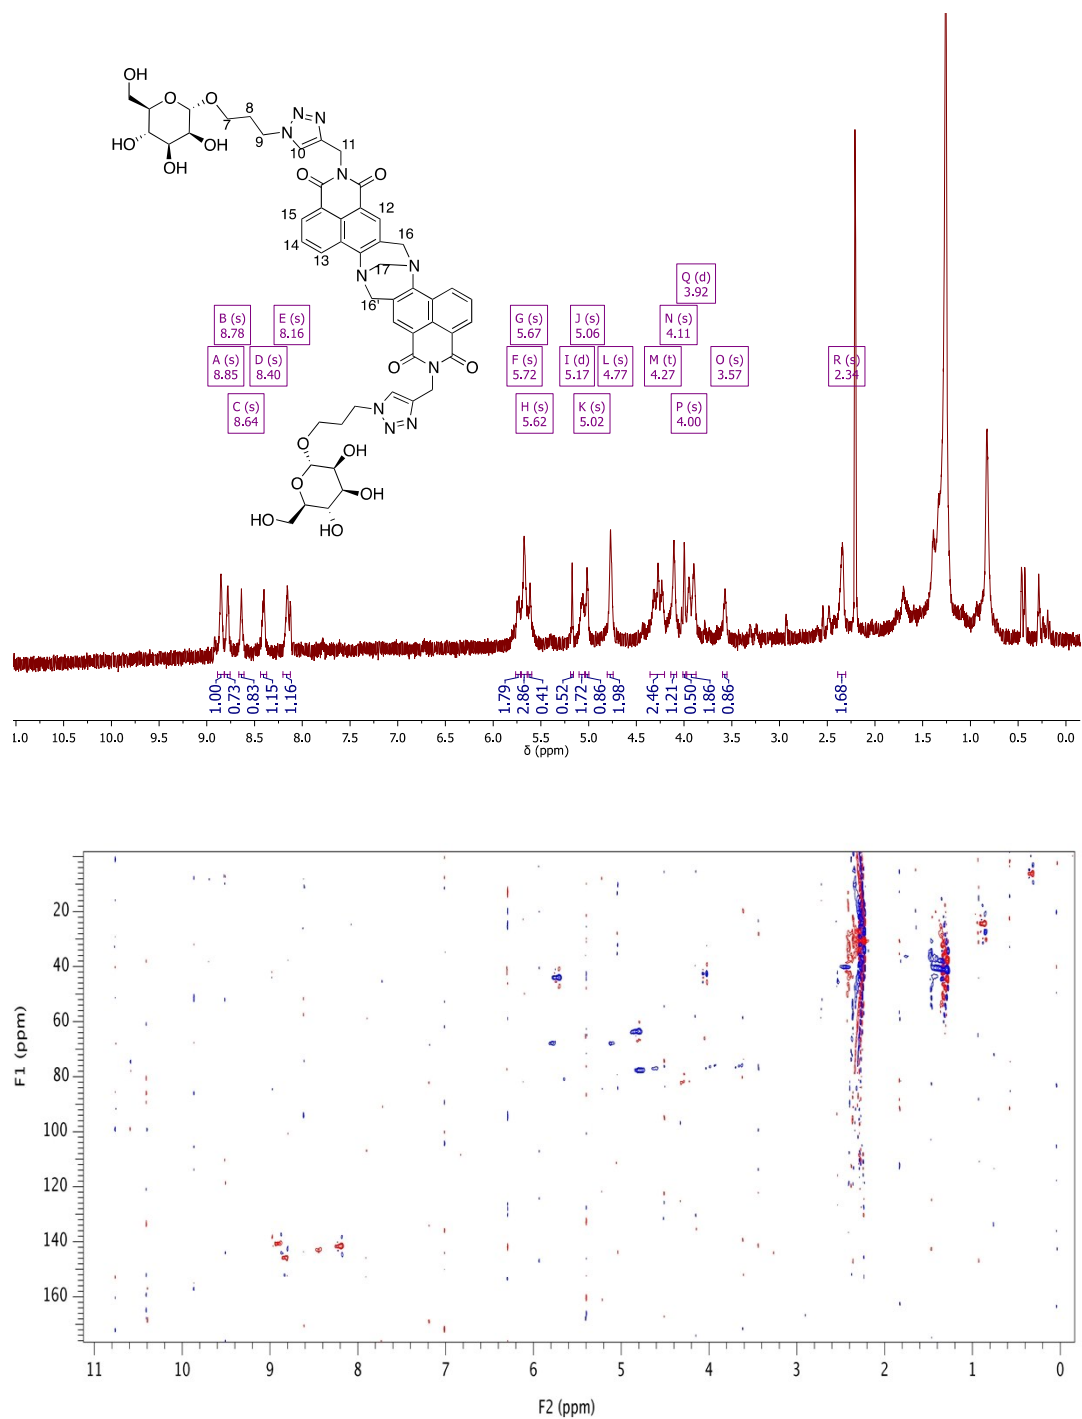

Fig S10 <sup>1</sup>H-NMR and HSQC of compound 3 in trifluoroacetic acid-d.

**References:**

1. Brouwer, A. M., *Pure and Appl. Chem.* 2011, **83**, 2213-2228.
2. Calatrava-Perez, E., Bright, S. A., Achermann, S., Moylan, C., Senge, M. O., Veale, E. B.; Williams, D. C.; Gunnlaugsson, T.; Scanlan, E. M., *Chem. Commun.* 2016, **52**, 13086-13089.
